RESEARCH ARTICLE

# Gender Differences in HIV Care among Criminal Justice-Involved Persons: Baseline Data from the CARE+ Corrections Study

Curt Beckwith<sup>1,2\*</sup>, Breana Uhrig Castonguay<sup>3</sup>, Claudia Trezza<sup>3</sup>, Lauri Bazerman<sup>1</sup>, Rudy Patrick<sup>3</sup>, Alice Cates<sup>3</sup>, Halli Olsen<sup>3</sup>, Ann Kurth<sup>4</sup>, Tao Liu<sup>5</sup>, James Peterson<sup>3</sup>, Irene Kuo<sup>3</sup>

**1** The Miriam Hospital, Providence, RI, United States of America, **2** Brown University Alpert School of Medicine, Providence, RI, United States of America, **3** George Washington University Milken Institute School of Public Health, Washington, DC, United States of America, **4** Yale University School of Nursing, New Haven, CT, United States of America, **5** Brown University School of Public Health, Providence, RI, United States of America

\* [cbeckwith@lifespan.org](mailto:cbeckwith@lifespan.org)

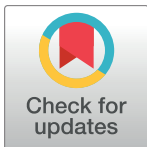

**OPEN ACCESS**

**Citation:** Beckwith C, Castonguay BU, Trezza C, Bazerman L, Patrick R, Cates A, et al. (2017) Gender Differences in HIV Care among Criminal Justice-Involved Persons: Baseline Data from the CARE+ Corrections Study. PLoS ONE 12(1): e0169078. doi:10.1371/journal.pone.0169078

**Editor:** Kathy Petoumenos, University of New South Wales, AUSTRALIA

**Received:** May 30, 2016

**Accepted:** December 7, 2016

**Published:** January 12, 2017

**Copyright:** © 2017 Beckwith et al. This is an open access article distributed under the terms of the [Creative Commons Attribution License](https://creativecommons.org/licenses/by/4.0/), which permits unrestricted use, distribution, and reproduction in any medium, provided the original author and source are credited.

**Data Availability Statement:** All relevant data are within the paper.

**Funding:** We would like to acknowledge funding from the National Institutes of Health, National Institute on Drug Abuse (R01DA030747) and institutional support from the Lifespan/Tufts/Brown Center for AIDS Research P30AI42853 and the District of Columbia Center for AIDS Research P30AI117970.

**Competing Interests:** The authors have declared that no competing interests exist.

## Abstract

### Background

HIV-infected individuals recently released from incarceration have suboptimal linkage and engagement in community HIV care. We conducted a study to evaluate an information and communication technology intervention to increase linkage to community care among HIV-infected persons recently involved in the criminal justice (CJ) system. Baseline characteristics including risk behaviors and HIV care indicators are reported and stratified by gender.

### Methods

We recruited HIV-infected individuals in the District of Columbia jail and persons with a recent history of incarceration through community and street outreach. Participants completed a baseline computer-assisted personal interview regarding HIV care and antiretroviral treatment (ART) adherence, substance use, and sexual behaviors. CD4 and HIV plasma viral load testing were performed at baseline or obtained through medical records. Data were analyzed for the sample overall and stratified by gender.

### Results

Of 110 individuals, 70% were community-enrolled, mean age was 40 (SD = 10.5), 85% were Black, and 58% were male, 24% female, and 18% transgender women. Nearly half (47%) had condomless sex in the three months prior to incarceration. Although drug dependence and hazardous alcohol use were highly prevalent overall, transgender women were more likely to have participated in drug treatment than men and women (90%, 61%, and 50% respectively;  $p = 0.01$ ). Prior to their most recent incarceration, 80% had an HIV provider and 91% had ever taken ART. Among those, only 51% reported  $\geq 90\%$  ART adherence. Fewer women (67%) had received HIV medications during their last incarceration compared to men (96%) and transgender women (95%;  $p = 0.001$ ). Although neither was

**Abbreviations:** CJ, criminal justice; ICT, information and communication technology; ART, antiretroviral treatment; MTF, male-to-female; STTR, Seek, Test, Treat, and Retain; DC DOC, District of Columbia Department of Corrections; MSM, men who have sex with men.

statistically significant, transgender women and men had higher proportions of baseline HIV viral suppression compared to women (80%, 69%, and 48.0% respectively,  $p > 0.05$ ); a higher proportion of women had a CD4 count  $\leq 200$  compared to men and transgender women (17%, 8% and 5% respectively;  $p > 0.05$ ).

## Conclusions

In this study, HIV-infected persons with recent incarceration in Washington, DC reported important risk factors and co-morbidities, yet the majority had access to HIV care and ART prior to, during, and after incarceration. Self-reported ART adherence was sub-optimal, and while there were not statistically significant differences, CJ-involved women appeared to be at greatest risk of poor HIV outcomes.

## Trial registration

Registered on ClinicalTrials.gov on 10/16/2012. Reference number: [NCT01721226](https://clinicaltrials.gov/ct2/show/study/NCT01721226).

## Background

Criminal justice (CJ)-involved persons, defined as persons with a history of incarceration in prison or jail and persons who have been under community corrections supervision (probation, parole), are disproportionately impacted by HIV infection. A high prevalence of substance use disorders, mental health disorders and racial and ethnic health disparities contribute to this increased burden [1, 2]. CJ populations experience high rates of unstable housing, unemployment, and poverty, which negatively influence retention in longitudinal HIV care [3]. Incarceration and subsequent release from a correctional facility have been associated with interruptions in antiretroviral treatment (ART) [4], loss of viral control [5] and failure to maintain adherence to ART [4, 6, 7]. Approximately one in seven HIV-infected persons in the United States (U.S.) passes through the CJ system annually [8], providing an opportunity to address the HIV care continuum [3] and to deliver interventions designed to improve access to HIV care and ART.

The majority of persons involved in the U.S. criminal justice system are men, with women representing only 7% of the prison population and up to 25% of persons on probation in the community [9, 10]. CJ-involved women and transgender persons have unique health challenges, yet these populations remain understudied. Incarcerated women have higher rates of substance use and addiction [11, 12], HIV infection [13, 14], hepatitis C virus infection [15], and mental health disorders [16, 17] compared to incarcerated males [18]. Transgender persons, particularly male-to-female (MTF) transgender women, experience high rates of HIV infection [19, 20], clinical depression [21], unstable housing [22], and gender violence and economic discrimination [23], which can contribute to risky sexual behaviors [24, 25].

Persons who cycle in and out of jails and prisons are at risk of transmitting HIV to sexual and drug-using partners; therefore, developing and implementing interventions to improve the delivery of HIV treatment to CJ-involved persons in order to achieve viral suppression is a public health priority. The Seek, Test, Treat, and Retain (STTR) strategy to control the HIV epidemic has been proposed as a public health approach to improve HIV outcomes through greater access to ART [26–28]. The STTR strategy is multi-pronged and includes increasing the identification of HIV-infected persons through expanded testing, linkage to HIV providers, improving access and adherence to ART, and maintaining long-term retention in care. If

achieved, this, in turn, decreases community transmission of HIV by creating a population of HIV-infected persons who are less infectious by effective ART [29].

In 2010, the National Institutes of Health/National Institute on Drug Abuse funded a research initiative to investigate the application of the STTR strategy among CJ-involved persons [25]. As part of this initiative, we launched the CARE+ Corrections Study conducted in Washington, D.C., a city with an HIV prevalence estimated to be at 2.5% of all residents and 5.8% among Black males [30]. The goal of the parent study was to develop and evaluate the efficacy of a technology-based intervention designed to improve linkage to community HIV providers and ART adherence following release from a correctional facility. With this intervention, our study aimed to address the Treat and Retain aspects of the STTR strategy using an intervention to leverage information and communication technology (ICT) tools. ICTs have the potential to be scalable among correctional facilities and community partners who assist persons released from prison or jail, also referred to as “returning citizens”. Given the gender diversity of the CARE+ Corrections Study participants, we herein describe their baseline characteristics and compare risk behaviors and HIV care indicators across men, women, and transgender persons.

## Methods

### Study Design

The CARE+ Corrections Study was originally designed as a randomized, controlled, longitudinal trial to evaluate the efficacy of the CARE+ Corrections intervention among a total study population of 320 participants. However, we encountered challenges with study implementation and participant enrollment within the Washington, DC Department of Corrections (DC DOC) facilities and were therefore unable to enroll a sufficient number of participants to evaluate the efficacy of the intervention. The study objective was changed to be a preliminary evaluation of feasibility and efficacy among 100 study participants, and enrollment was adapted to include persons recruited inside the correctional facilities and persons in the community recently released from a correctional facility, thus providing a convenience sample of persons involved with the criminal justice system. Recruitment within correctional facilities was stratified to ensure enrollment of at least 25% females; recruitment in the community was not stratified based upon gender. Within strata, participants were randomly assigned to either the CARE+ Corrections intervention or the control arm on a 1:1 basis using a computer-generated randomization scheme.

### Intervention and Control Groups

The CARE+ Corrections Study intervention contained two components. The first was a computerized counseling session (“CARE+ Corrections”). This was an adapted version of the CARE+ counseling tool, a one-session, interactive, computerized motivational interview that assessed a person’s risk and HIV care behaviors (including HIV care utilization, ART adherence, and retention in HIV care) and provided an individualized risk reduction plan for ART adherence or linkage to care [31, 32, 33]. CARE+ Corrections was specifically designed to provide counseling to HIV-infected persons being released from correctional facilities. Counseling content focused on linkage to community HIV care, ART adherence, and reducing risk behaviors [31, 34]. Participants received a printout at the end of the session that summarized goals and provided relevant HIV treatment referrals.

The second component of the CARE+ Corrections Study intervention was scheduled text messages to the participant following release from a correctional facility. The text messages included supportive behavioral messaging (e.g., “One day at a time. Just for today, don’t use.”)

as well as medication and appointment reminder messages. Participants were able to select pre-scripted messages or create their own messages, and to select frequency and timing of messaging (e.g., daily, weekly, morning, evening). All participants in the intervention group received a cell phone and mobile service supported by the study in order to ensure the receipt of study-based text messages.

Participants in the control group watched an educational video on opioid overdose prevention and received a printout of local HIV providers and resources. The length of the video was approximately equal to the time intervention group participants spent completing the CARE + Corrections counseling session. Participants in the control group did not receive a cell phone or the text messaging intervention.

## Study Population and Eligibility

The target population was HIV-infected individuals with a recent history of incarceration. Study eligibility included being at least 18 years old, HIV-infected by self-report, incarcerated in the DC DOC with an anticipated release date within six weeks or residing in the community but having been released from a jail, prison or halfway house within the previous six months (confirmed by study staff using public records), planning on remaining in the geographic area through the end of the study period, and able to provide informed consent for study participation.

## Recruitment

Recruitment occurred in DC DOC facilities and in the community. Within DC DOC facilities, participants were recruited in either the Central Detention Facility, which houses men and male-to-female transgender persons, or the Correctional Treatment Facility, which houses men and women and includes a 100-bed treatment facility for persons with substance use disorders. The screening and recruitment occurred in the medical units and treatment facility of the DC DOC where HIV care is provided by a contracted medical provider. In these locations, study staff provided information about the study to potentially interested participants, conducted eligibility assessments, and obtained written informed consent and enrolled participants. HIV-infected persons incarcerated within the DC DOC received comprehensive HIV care including access to ART. Discharge planning services at the time of release included provision of a 30-day supply of HIV medications and a referral to community HIV providers.

Individuals from the community were recruited through a combination of street-based recruitment, advertisement at and referrals from local community-based organizations that provide services to returning citizens (such as the Mayor's Office of Returning Citizens Affairs, shelters, transitional housing programs, female and transgender-friendly agencies, and drug treatment programs), and referrals from other study participants. Persons interested in the study were scheduled for eligibility screening, consenting and completion of the baseline visit at a research clinic in the community. Participants were enrolled between August 24, 2013 and April 30, 2015, with participant follow-up continuing through December 10, 2015.

## Data Collection

Although enrolled participants had follow-up assessments at 3 months and 6 months, we report only on data collected at the baseline visit. The baseline visit included an interviewer-administered structured assessment covering domains related to demographic characteristics, criminal justice history, HIV care engagement, medication adherence, sexual and substance use behaviors, and mental health and other co-morbid conditions. Participants provided a whole blood specimen obtained by venipuncture to measure the baseline HIV plasma viral

load (PVL) and CD4 cell count; and completed an in-depth locator form for study retention purposes. Participants enrolled within DC DOC facilities completed the baseline appointment over two visits so that only non-sensitive behavioral data (e.g., demographics, health care utilization and medication adherence prior to current incarceration) were collected inside of the facility. Following release, these participants were scheduled within one week of release to complete the baseline visit (including assessment of sexual and substance use behaviors and venipuncture for a blood specimen to conduct the HIV PVL and CD4 count). Specimens were sent to Miriam Hospital in Rhode Island for HIV PVL testing conducted by the Roche Cobas AmpliPrep/ Cobas Taqman HIV-1 Test, Version 2.0. CD4 cell count testing was completed by LabCorp via the Becton Dickinson Canto II flow cytometer. When study staff were unable to obtain blood from venipuncture or when a DOC-recruited participant did not return to complete the baseline visit in the community following release, DOC or community medical records from previous the six month period were abstracted to collect HIV PVL and CD4 count data to establish baseline values. Informed consent for medical records abstraction was obtained at the time of study enrollment.

## Variable Definitions

Gender was defined based on a series of questions about gender identity and sex assignment at birth. For the purposes of this analysis, a participant was designated as transgender if the individual reported a “transgender” gender identity or if their reported gender differed from their reported sex assignment at birth. Criminal justice experience included the length of the most recent incarceration and the number of times ever been in jail, prison, or juvenile detention. Sexual risk behaviors in the three months prior to their most recent incarceration were assessed, including condomless sex, exchange sex, number of sexual partners, and if designated as male or as a transgender woman, ever and recent sex with a male partner. Substance use was assessed for alcohol and both injection and non-injection drugs during the three months prior to incarceration, as well as lifetime use of injection drugs. Drug dependence, categorized as “not drug dependent” and “drug dependent”, was assessed using the TCU Drug Dependence scale and hazardous alcohol use was determined using the WHO-AUDIT with participants categorized as low, medium or high hazardous harmful alcohol use, both of which have been previously validated [35, 36]. Symptoms related to post-traumatic stress disorder (PTSD) and depression were assessed using the Primary Care PTSD Screen and the CES-D instruments, respectively [37, 38]. In addition, participants were asked if they had even been told by a health care provider that they had a mental health disorder diagnosis (schizophrenia, depression, bipolar disorder, personality disorder). In addition to HIV PVL and CD4 cell count, other HIV care indicators included having an HIV medical provider in the community (i.e., linkage to community care) and self-reported adherence to ART 30 days prior to incarceration and during incarceration. Adherence was measured by a visual analog scale (VAS) where participants estimated the proportion of prescribed ART doses (0–100%) taken during the previous 30 days [39]. Optimal self-reported ART adherence was defined as  $\geq 90\%$ . Continuous viral load was categorized as  $< 200$  (undetectable) and  $\geq 200$  copies/mL. CD4 cell count was categorized as  $\leq 200$  and  $> 200$  cell per uL.

## Data Analysis

For this analysis, only study participants with complete baseline data were included. The analysis was stratified by gender in order to assess differences among female, male, and transgender study participants. Depending on the data distributional properties, frequencies and percentages, or means and standard deviation (SD) were calculated for demographic characteristics,

criminal justice history, sexual and substance use behaviors, healthcare utilization, and HIV care. For categorical variables, gender differences were examined by chi-square tests or Fisher's exact tests, and for continuous variables, these differences were assessed by Student's *t*-tests or Wilcoxon rank sum tests. Statistical significance was set at  $p = 0.05$ , and all data management and analyses were conducted using SAS 9.3 (Cary, NC).

## Institutional Review Board Approval

This study was approved by the institutional review boards of The Miriam Hospital and The George Washington University. Because this study included prisoners, the protocol was also approved by the U.S. Office of Human Subjects Research Protection. A Certificate of Confidentiality was obtained to further protect the responses of the study participants, and the study was registered with ClinicalTrials.gov (NCT01721226).

## Results

A total of 497 persons were pre-screened and 219 were assessed for study eligibility. Of the 112 persons who provided informed consent and were enrolled in the study, 110 completed baseline data collection and were included in this analysis (see CONSORT flowchart in Fig 1).

Table 1 displays the demographic characteristics and site of enrollment for these participants; 70% were enrolled from the community and 30% were enrolled within the DC DOC. Mean age was 40 (SD = 10.5), and most were Black or African American (85%). The majority of participants were male (58%), 24% were female, and 18% were transgender, all of whom were MTF transgender women. There were no differences across gender groups in race and lifetime number of incarcerations (mean 10.8, SD = 9.9). The length of last incarceration was shortest for women, at 4.8 months (SD = 11.5) compared to 19.8 months (SD = 47.4) for men and 8.9 months (SD = 21.4) for transgender women ( $p < 0.0001$ ).

Table 2 displays sexual behaviors, substance use and mental health characteristics. Nearly half (47%) of the study sample had engaged in condomless sex in the three months prior to their last incarceration, but this did not differ across genders. However, engaging in exchange sex was significantly higher for women and transgender women (54% and 65%, respectively) compared to men (12%,  $p < 0.001$ ). Among men and transgender women, 27% of men and all transgender women reported having had sex with a man ( $p < 0.001$ ), and 17% of men and 79% of transgender women reported having anal sex with a man in the three months before their last incarceration ( $p < 0.001$ ).

Drug dependence (57%), lifetime history of injection drug use (15%), recent non-injection drug use (65%), and hazardous alcohol consumption (45%) were all highly prevalent in this sample but did not differ across genders. However, transgender women were significantly more likely to have participated in drug treatment compared to men and women (90% versus 61% and 50%, respectively,  $p = 0.0117$ ). In terms of mental health, depressive symptoms (52%) and previous diagnosis of schizophrenia (23%), personality (17%) and bipolar disorders (59%), and post-traumatic stress disorder (44%) were all highly prevalent but did not differ across genders.

Table 3 displays baseline HIV treatment and care indicators. Overall, more than 80% of study participants had a regular HIV healthcare provider prior to their last incarceration, and nearly all (91%) had ever taken HIV treatment. Only half (51%) indicated optimal HIV treatment adherence in the 3 months prior to their last incarceration, and this did not differ by gender. However, being on HIV treatment during their last incarceration was significantly lower for women compared to men and transgender women (67% among women versus 96% and 95% among men and transgender women, respectively,  $p = 0.001$ ). In addition, all transgender women reported currently having a regular HIV provider in the community, versus 75%

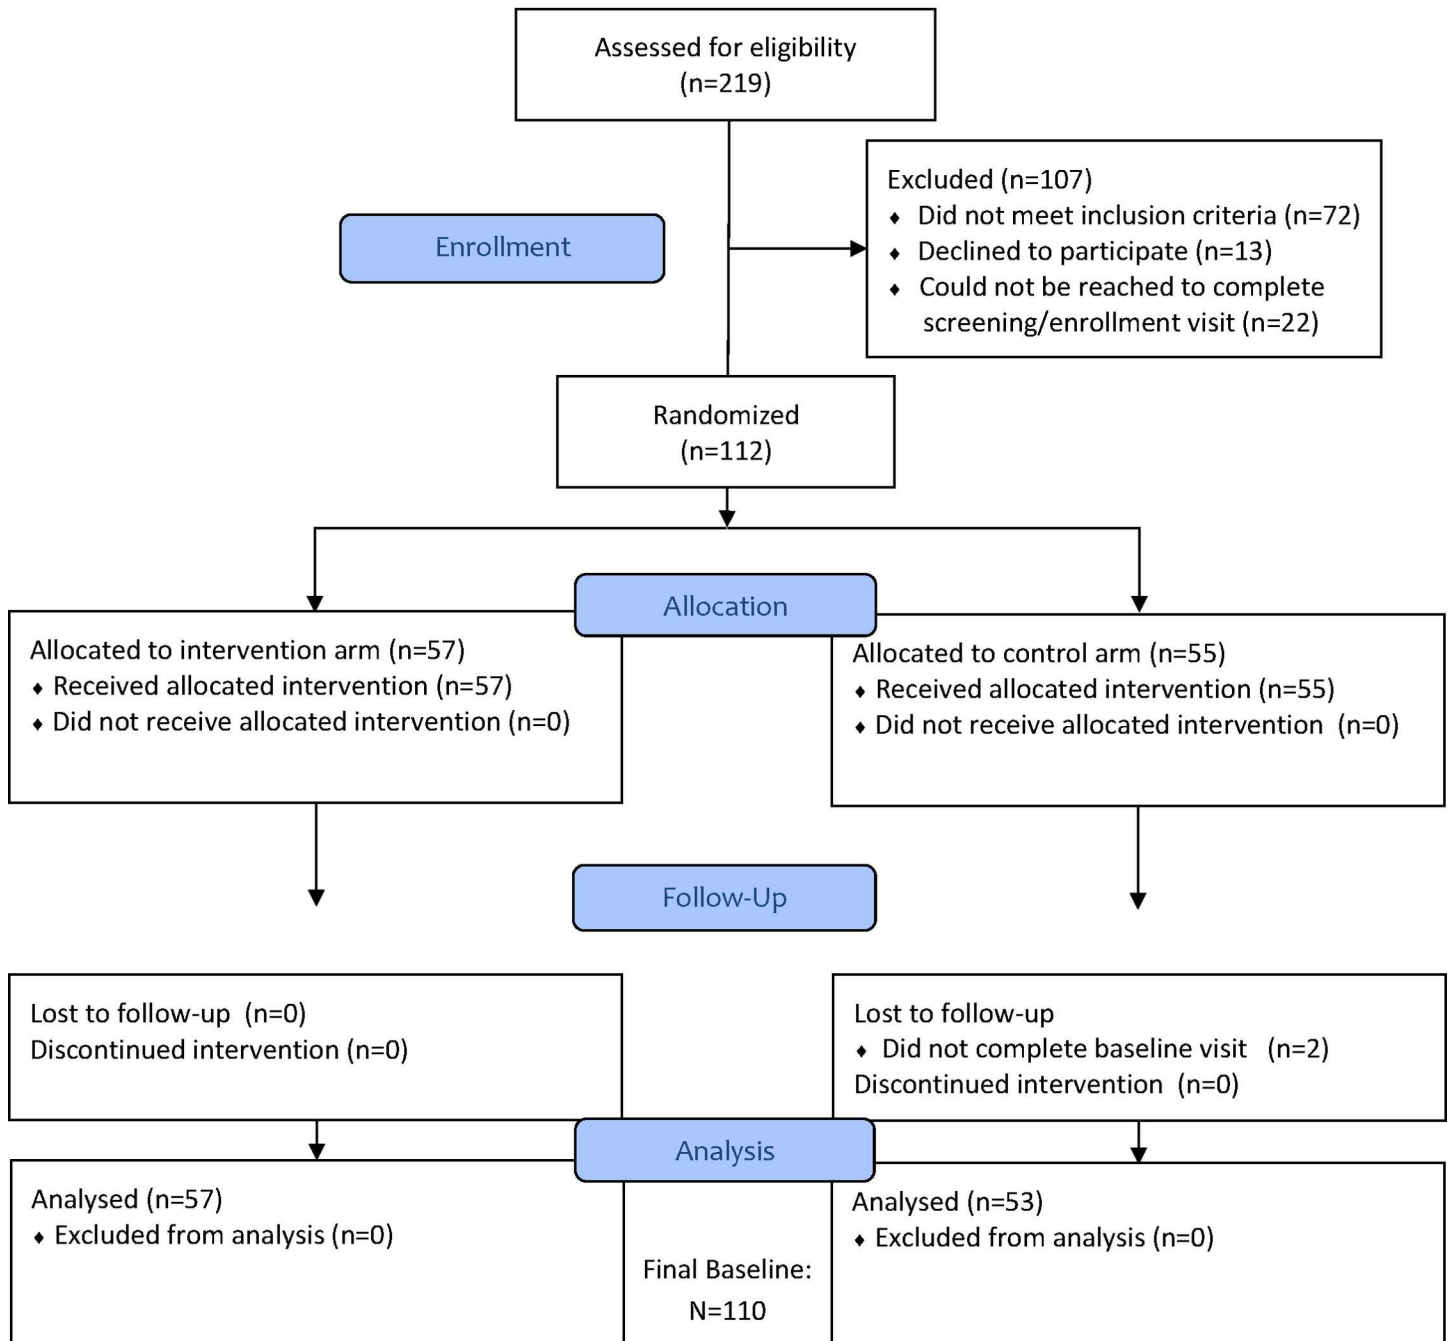

Fig 1. CONSORT Diagram.

doi:10.1371/journal.pone.0169078.g001

among men and 77% among women ( $p = 0.02$ ). Ninety-three (88%) study participants completed phlebotomy and 13 had their medical charts reviewed for baseline HIV plasma viral load and CD4 counts. At baseline, 80% of transgender women, 69% of men, and 48% of women achieved HIV viral suppression ( $<200$  copies/mL), although these differences were not statistically significant. Women had the highest proportion of having a CD4 count  $\leq 200$  compared to men and transgender women (5% for transgender women versus 8% for men and 17% for women), but this also was not statistically significant.

**Table 1. Demographic Characteristics of CARE+ Corrections Study participants, stratified by gender (N = 110).**

|                                                           | Male |        | Female |        | Transgender (MTF) |        | Total |        | p-value           |
|-----------------------------------------------------------|------|--------|--------|--------|-------------------|--------|-------|--------|-------------------|
| <b>Enrollment location n (%)</b>                          |      |        |        |        |                   |        |       |        | 0.1286            |
| Community                                                 | 40   | (62.5) | 21     | (80.8) | 16                | (80.0) | 77    | (70.0) |                   |
| DC Department of Corrections                              | 24   | (37.5) | 5      | (19.2) | 4                 | (20.0) | 33    | (30.0) |                   |
| <b>Race/Ethnicity n (%)</b>                               |      |        |        |        |                   |        |       |        | 0.7504            |
| Black/African American                                    | 56   | (87.5) | 21     | (80.8) | 17                | (85.0) | 94    | (85.5) |                   |
| White                                                     | 1    | (1.6)  | 2      | (7.7)  | 1                 | (5.0)  | 4     | (3.6)  |                   |
| Hispanic                                                  | 1    | (1.6)  | 0      | (0.0)  | 0                 | (0.0)  | 1     | (0.9)  |                   |
| Other                                                     | 6    | (9.4)  | 3      | (11.5) | 2                 | (10.0) | 11    | (10.0) |                   |
| <b>Age—Mean (SD)</b>                                      | 42   | (10.7) | 39     | (9.2)  | 35                | (9.4)  | 40    | (10.5) | <b>0.0251</b>     |
| <b>Sexual orientation n (%)</b>                           |      |        |        |        |                   |        |       |        | <b>0.0023</b>     |
| Heterosexual or straight                                  | 51   | (79.7) | 24     | (92.3) | 9                 | (45.0) | 84    | (76.4) |                   |
| Homosexual, gay or lesbian                                | 8    | (12.5) | 1      | (3.9)  | 9                 | (45.0) | 18    | (16.4) |                   |
| Bisexual                                                  | 5    | (7.8)  | 1      | (3.9)  | 2                 | (10.0) | 8     | (7.3)  |                   |
| <b>Length of last incarceration, months—Mean (SD)</b>     | 19.8 | (47.4) | 4.8    | (11.5) | 8.9               | (21.4) | 14.3  | (38.3) | <b>&lt; .0001</b> |
| <b>Number of times in jail/prison, lifetime—Mean (SD)</b> | 10.3 | (8.6)  | 11.8   | (13.2) | 10.7              | (8.5)  | 10.8  | (9.9)  | 0.9067            |

Bold text indicates p<0.05.

doi:10.1371/journal.pone.0169078.t001

## Discussion

HIV-infected persons with a history of incarceration in Washington, DC represent a vulnerable population, experiencing a high frequency of lifetime arrests as well as high prevalence of drug use, problem drinking, mental health disorders, and sexual risk behaviors. In our sample, engagement with HIV care before and after the most recent incarceration was high among the sample, but pre-incarceration ART adherence was sub-optimal and females had less access to ART during their incarceration. Baseline CD4 counts were lower and viral suppression was less frequent for women compared to males and transgender persons but these findings were not statistically significant. ART adherence remains a challenge for persons recently involved in the CJ system and needs to be the focus of public health efforts to reduce community viral load.

The majority of the study population reported having access to a regular healthcare provider and HIV treatment prior to their most recent incarceration (83% and 91%, respectively); however, only 51% reported optimal HIV treatment adherence on the VAS scale during the three months prior to their most recent incarceration. Nearly all (89%) reported receiving HIV treatment during their recent incarceration and 86% reported being on ART at the time the baseline assessment was completed in the community after release; 62% had a suppressed viral load based on objective laboratory data. This proportion of participants with viral suppression is higher than the estimate that only 30% of HIV-infected persons in the U.S. have achieved viral suppression; and more similar to recent studies that estimated viral suppression among persons in HIV care [40–42]. Collectively, these data suggest that this population in Washington, DC has reliable access to HIV providers prior to, during, and after incarceration, yet ART adherence could be improved and this would lead to higher rates of viral suppression. A recent study demonstrated that self-report of being engaged in HIV care was not always reliable when compared to clinic visit data [43]. Therefore, further research is needed to determine the causes of poor ART adherence in this population and the relative contribution of missed clinic visits. Regardless, there is a need to improve ART adherence among persons who are viremic



**Table 2. Sexual risk behaviors, substance use, and mental health disorders among CARE+ Corrections Study participants, stratified by gender (N = 110).**

|                                                                             | Male |        | Female |        | Transgender (MTF) |         | Total |        | p-value           |
|-----------------------------------------------------------------------------|------|--------|--------|--------|-------------------|---------|-------|--------|-------------------|
|                                                                             | n    | (%)    | n      | (%)    | n                 | (%)     | n     | (%)    |                   |
| <b>Any condomless sex in 3 mo before last incarceration</b>                 |      |        |        |        |                   |         |       |        | 0.6443            |
| No                                                                          | 34   | (53.1) | 12     | (46.2) | 12                | (60.0)  | 58    | (52.7) |                   |
| Yes                                                                         | 30   | (46.9) | 14     | (53.9) | 8                 | (40.0)  | 52    | (47.3) |                   |
| <b>Ever had sex with a man (among men and transgender)<sup>1</sup></b>      |      |        |        |        |                   |         |       |        | <b>&lt; .0001</b> |
| No                                                                          | 47   | (73.4) | 0      | (0.0)  | 0                 | (0.0)   | 47    | (56.6) |                   |
| Yes                                                                         | 17   | (26.6) | 0      | (0.0)  | 19                | (100.0) | 36    | (43.4) |                   |
| <b>Had anal sex with man in 3 mo before last incarceration<sup>1</sup></b>  |      |        |        |        |                   |         |       |        | <b>&lt; .0001</b> |
| No                                                                          | 53   | (82.8) | 0      | (0.0)  | 4                 | (27.1)  | 57    | (68.7) |                   |
| Yes                                                                         | 11   | (17.2) | 0      | (0.0)  | 15                | (79.0)  | 26    | (31.3) |                   |
| <b>Exchange sex in 3 mo before last incarceration</b>                       |      |        |        |        |                   |         |       |        | <b>&lt; .0001</b> |
| No                                                                          | 56   | (87.5) | 12     | (46.2) | 7                 | (35.0)  | 75    | (68.2) |                   |
| Yes                                                                         | 8    | (12.5) | 14     | (53.9) | 13                | (65.0)  | 35    | (31.8) |                   |
| <b>Drug Dependence (TCU score) (12 mo before last incarceration)</b>        |      |        |        |        |                   |         |       |        | 0.8070            |
| No                                                                          | 29   | (45.3) | 10     | (38.5) | 8                 | (40.0)  | 47    | (42.7) |                   |
| Yes                                                                         | 35   | (54.7) | 16     | (61.5) | 12                | (60.0)  | 63    | (57.3) |                   |
| <b>Ever injected drugs</b>                                                  |      |        |        |        |                   |         |       |        | 0.1832            |
| No                                                                          | 51   | (79.7) | 24     | (92.3) | 19                | (95.0)  | 94    | (85.5) |                   |
| Yes                                                                         | 13   | (20.3) | 2      | (7.7)  | 1                 | (5.0)   | 16    | (14.6) |                   |
| <b>Non-injection drug use in 3 mo before last incarceration<sup>2</sup></b> |      |        |        |        |                   |         |       |        | 0.1384            |
| No                                                                          | 22   | (37.3) | 10     | (43.5) | 2                 | (13.3)  | 34    | (35.1) |                   |
| Yes                                                                         | 37   | (62.7) | 13     | (56.5) | 13                | (86.7)  | 63    | (64.9) |                   |
| <b>Ever been in drug treatment</b>                                          |      |        |        |        |                   |         |       |        | <b>0.0117</b>     |
| No                                                                          | 25   | (39.1) | 13     | (50.0) | 2                 | (10.0)  | 40    | (36.4) |                   |
| Yes                                                                         | 39   | (60.9) | 13     | (50.0) | 18                | (90.0)  | 70    | (63.6) |                   |
| <b>Alcohol use (WHO AUDIT)</b>                                              |      |        |        |        |                   |         |       |        | 0.2825            |
| Low hazardous or harmful alcohol use                                        | 30   | (46.9) | 17     | (65.4) | 14                | (70.0)  | 61    | (55.5) |                   |
| Medium hazardous or harmful alcohol use                                     | 13   | (20.3) | 3      | (11.5) | 1                 | (5.0)   | 17    | (15.5) |                   |
| High hazardous or harmful alcohol use                                       | 21   | (32.8) | 6      | (23.1) | 5                 | (25.0)  | 32    | (29.1) |                   |
| <b>Depressive symptoms (CESD-10)</b>                                        |      |        |        |        |                   |         |       |        | 0.7904            |
| No                                                                          | 32   | (50.0) | 11     | (42.3) | 10                | (50.0)  | 53    | (48.2) |                   |
| Yes                                                                         | 32   | (50.0) | 15     | (57.7) | 10                | (50.0)  | 57    | (51.8) |                   |
| <b>Ever diagnosed with schizophrenia<sup>3</sup></b>                        |      |        |        |        |                   |         |       |        | 0.5195            |
| No                                                                          | 51   | (81.0) | 17     | (65.4) | 16                | (80.0)  | 84    | (77.1) |                   |
| Yes                                                                         | 12   | (19.0) | 9      | (34.6) | 4                 | (20.0)  | 25    | (22.9) |                   |
| <b>Ever diagnosed with personality disorder<sup>3</sup></b>                 |      |        |        |        |                   |         |       |        | 0.4152            |
| No                                                                          | 55   | (87.3) | 19     | (73.1) | 16                | (80.0)  | 90    | (82.6) |                   |
| Yes                                                                         | 8    | (12.7) | 7      | (26.9) | 4                 | (20.0)  | 19    | (17.4) |                   |
| <b>Ever diagnosed with bi-polar/manic depression<sup>3</sup></b>            |      |        |        |        |                   |         |       |        | 0.3946            |
| No                                                                          | 28   | (43.8) | 9      | (34.6) | 8                 | (42.1)  | 45    | (41.3) |                   |
| Yes                                                                         | 36   | (56.3) | 17     | (65.4) | 11                | (57.9)  | 64    | (58.7) |                   |
| <b>Positive screen for PTSD</b>                                             |      |        |        |        |                   |         |       |        | 0.7444            |
| No                                                                          | 37   | (57.8) | 13     | (50.0) | 12                | (60.0)  | 62    | (56.4) |                   |
| Yes                                                                         | 27   | (42.2) | 13     | (50.0) | 8                 | (40.0)  | 48    | (43.6) |                   |

1. N = 83.

2. Of those who reported ever using non-injection drugs (N = 97).

3. N = 109.

Bold text indicates p<0.05.

**Table 3. HIV treatment and care indicators among CARE+ Corrections Study participants, stratified by gender (N = 110).**

|                                                                                 | Male |        | Female |        | Transgender (MTF) |         | Total |        | p-value       |
|---------------------------------------------------------------------------------|------|--------|--------|--------|-------------------|---------|-------|--------|---------------|
|                                                                                 | n    | (%)    | n      | (%)    | n                 | (%)     | n     | (%)    |               |
| <b>Had regular healthcare provider pre-incarceration</b>                        |      |        |        |        |                   |         |       |        | 0.2065        |
| No                                                                              | 14   | (21.9) | 4      | (15.4) | 1                 | (5.0)   | 19    | (17.3) |               |
| Yes                                                                             | 50   | (78.1) | 22     | (84.6) | 19                | (95.0)  | 91    | (82.7) |               |
| <b>Ever been on HIV treatment</b>                                               |      |        |        |        |                   |         |       |        | 0.9013        |
| No                                                                              | 7    | (10.9) | 2      | (7.7)  | 1                 | (5.0)   | 10    | (9.1)  |               |
| Yes                                                                             | 57   | (89.1) | 24     | (92.3) | 19                | (95.0)  | 100   | (90.9) |               |
| <b>HIV treatment adherence in 30 days before last incarceration<sup>1</sup></b> |      |        |        |        |                   |         |       |        | 0.3403        |
| 0%-80%                                                                          | 23   | (56.1) | 6      | (40.0) | 6                 | (37.5)  | 35    | (48.6) |               |
| 90%-100%                                                                        | 18   | (43.9) | 9      | (60.0) | 10                | (62.5)  | 37    | (51.4) |               |
| <b>Took HIV treatment during incarceration<sup>2</sup></b>                      |      |        |        |        |                   |         |       |        | <b>0.0011</b> |
| No                                                                              | 2    | (3.5)  | 8      | (33.3) | 1                 | (5.3)   | 11    | (11.0) |               |
| Yes                                                                             | 55   | (96.5) | 16     | (66.7) | 18                | (94.7)  | 89    | (89.0) |               |
| <b>Currently have regular HIV healthcare provider</b>                           |      |        |        |        |                   |         |       |        | <b>0.0245</b> |
| No                                                                              | 16   | (25.0) | 6      | (23.1) | 0                 | (0.0)   | 22    | (20.0) |               |
| Yes                                                                             | 48   | (75.0) | 20     | (76.9) | 20                | (100.0) | 88    | (80.0) |               |
| <b>Currently taking HIV treatment</b>                                           |      |        |        |        |                   |         |       |        | 0.9306        |
| No                                                                              | 9    | (14.1) | 4      | (15.4) | 2                 | (10.0)  | 15    | (13.6) |               |
| Yes                                                                             | 55   | (85.9) | 22     | (84.6) | 18                | (90.0)  | 95    | (86.4) |               |
| <b>Baseline Viral Load<sup>3</sup></b>                                          |      |        |        |        |                   |         |       |        | 0.0614        |
| <200 copies/mL                                                                  | 42   | (68.9) | 12     | (48.0) | 16                | (80.0)  | 70    | (66.0) |               |
| ≥ 200 copies/mL                                                                 | 19   | (31.1) | 13     | (52.0) | 4                 | (20.0)  | 36    | (34.0) |               |
| <b>Baseline CD4 Count<sup>4</sup></b>                                           |      |        |        |        |                   |         |       |        | 0.4229        |
| ≤200 cells/uL                                                                   | 5    | (8.2)  | 4      | (16.7) | 1                 | (5.0)   | 10    | (9.5)  |               |
| >200 cells/uL                                                                   | 56   | (91.8) | 20     | (83.3) | 19                | (95.0)  | 95    | (90.5) |               |

1. Of those on HIV treatment before last incarceration (N = 72).

2. Of those reporting ever on HIV treatment (N = 100).

3. N = 106.

4. N = 105.

Bold text indicates p<0.05.

doi:10.1371/journal.pone.0169078.t003

and have concurrent risk behaviors given that they may transmit HIV to sex and drug using partners, supporting the premise that this is a high priority population for intervention.

The relatively large proportions of transgender women and men who have sex with men (MSM) that were recruited into the study was not anticipated. These groups, particularly HIV-infected MSM and transgender women, remain largely hidden within correctional populations and few studies have estimated their prevalence. The multi-site Enhance Link Initiative enrolled over 1200 HIV-infected persons with a history of jail incarceration and among these, 20% identified as MSM or bisexual [44], which was consistent with the proportion observed in our study. These findings and our results suggest that HIV-infected MSM, bisexuals, and transgender women may represent a larger proportion of HIV-infected persons behind bars than previously recognized. More research is needed to understand the epidemiology, risk profiles, and unique barriers to health services that these persons are likely to encounter in the coercive and highly stigmatized environment of correctional facilities.

The study revealed some important gender differences among our study population. Women exhibited worse outcomes compared to both men and transgender women, which is

consistent with the literature [16, 17, 45, 46]. Women in our study were less likely to receive ART during their incarceration compared to men and transgender women and were least likely to have viral suppression at the baseline assessment. Being less likely to receive treatment during the recent incarceration may have been mediated by having shorter incarcerations. Women in our sample receiving ART had longer incarceration periods (3.38 months, SD = 2.14) compared to women who did not receive ART (mean = 0.74 months, SD = 2.14) ( $p = 0.003$ ). Prior research has found that acceptance of ART in a correctional facility among women can be affected by stigma, perceived trust of a provider, and satisfaction of care [47], but there are few studies surrounding these issues and results are inconclusive. For example, contrary to our findings, another study found that even with shorter incarcerations, women were more likely to achieve viral suppression during incarceration compared to men [46]. More research is needed to understand acceptability of ART in a correctional setting and if shorter incarceration periods impose structural barriers (e.g., waiting to be seen by a provider) that reduce access to ART among women. This difference in access to ART is important because it is well documented that women, on average, serve shorter sentences compared to men [48].

Transgender women in our sample were more likely to have an HIV care provider prior to incarceration and at the baseline visit compared to both men and women. The reasons for these findings remain unclear, yet this is encouraging given other studies have shown HIV-infected transgender women to have poorer access to care including ART and a greater number of social and structural barriers to care [49–55]. Our findings suggest qualitative research is needed to identify both facilitators and barriers to HIV care and ART among transgender persons who have a history of incarceration.

Our study had several limitations. The generalizability of our findings to other correctional populations is limited by several factors: the sample size was small and therefore lowered the power to detect significant differences between gender groups that may have existed; the study population was relatively homogeneous in terms of race (85% were Black/ African-American); and one-half of study participants received a phone which may have prevented some persons from enrolling given there was a 50% chance of not receiving a phone. We opted to recruit study participants from the DC DOC facilities and from the community following release due to difficulty in launching recruitment inside of the DC DOC. This resulted in a more heterogeneous population that may differ with respect to HIV care and risk behaviors. However, there were few significant differences in risk behaviors by enrollment site, and no significant differences in demographic characteristics or HIV care (data not shown). Community recruitment largely occurred through social support agencies that supported returning citizens. This may have introduced some selection bias favoring HIV-infected persons who were engaged with these agencies; however, we also recruited through street-outreach in an effort to enroll a more representative population of returning citizens. Our analysis of baseline viral suppression included both laboratory testing conducted by the study and PVL data obtained from medical chart review, which increased the variability of length of time between study entry and assessment of viral suppression. Despite these limitations, this analysis represents a unique examination of HIV care and risk behaviors among recently incarcerated persons, including transgender women.

## Conclusions

Improving HIV treatment outcomes among CJ-involved persons is an important component to the broader STTR strategy given the vulnerability of this population and the fact that the vast majority of incarcerated HIV-infected persons eventually return to their communities.

Our findings emphasize that improving ART adherence among CJ-involved persons remains a high priority for intervention, particularly among CJ-involved women who are at greatest risk of poor HIV outcomes. Differences in HIV care indicators and risk behaviors among men, women, and transgender women further support the need for additional research to develop gender-specific interventions to address the unique needs of each group.

## Supporting Information

**S1 File. IRB-approved Study Protocol.**  
(DOCX)

**S2 File. Baseline CONSORT 2010 Checklist.**  
(DOC)

## Acknowledgments

We would like to acknowledge funding from the National Institutes of Health, National Institute on Drug Abuse (R01DA030747) and institutional support from the Lifespan/Tufts/Brown Center for AIDS Research P30AI42853 and the District of Columbia Center for AIDS Research P30AI117970. We would also like to acknowledge our District of Columbia Department of Corrections partners (Drs. Beth Mynett and Reena Chakraborty) and community-based partners for their support and assistance in conducting this work. Lastly, we would like to thank the study participants without whom we could not do this work.

## Author Contributions

**Conceptualization:** CB IK AK.

**Data curation:** TL RP AC.

**Formal analysis:** TL RP.

**Funding acquisition:** CB AK IK.

**Investigation:** CB BUC CT LB RP AC HO AK TL JP IK.

**Methodology:** CB IK AK TL LB AC.

**Project administration:** CT LB.

**Supervision:** CB CT IK.

**Writing – original draft:** CB BUC LB IK.

**Writing – review & editing:** RP AC HO AK TL JP IK.

## References

1. Binswanger IA, Redmond N, Steiner JF, Hicks LS. Health disparities and the criminal justice system: an agenda for further research and action. *J Urban Health*, 2012. 89(1): p. 98–107. doi: [10.1007/s11524-011-9614-1](https://doi.org/10.1007/s11524-011-9614-1) PMID: [21915745](https://pubmed.ncbi.nlm.nih.gov/21915745/)
2. Shubert G. Mass Incarceration, Housing instability and HIV/AIDS: Research Findings and Policy Recommendations: a report on the effects of incarceration and HIV/AIDS on marginalized communities. 2013, National Minority AIDS Council and Housing Works: National Minority AIDS Council and Housing Works. p. 38.
3. Iroh PA, Mayo H, Nijhawan AE. The HIV Care Cascade Before, During, and After Incarceration: A Systematic Review and Data Synthesis. *Am J Public Health*, 2015. 105(7): p. e5–16. doi: [10.2105/AJPH.2015.302635](https://doi.org/10.2105/AJPH.2015.302635) PMID: [25973818](https://pubmed.ncbi.nlm.nih.gov/25973818/)

4. Baillargeon J, Giordano TP, Rich JD, Wu ZH, Wells K, Pollock BH, et al. Accessing antiretroviral therapy following release from prison. *JAMA*, 2009. 301(8): p. 848–57. doi: [10.1001/jama.2009.202](https://doi.org/10.1001/jama.2009.202) PMID: [19244192](https://pubmed.ncbi.nlm.nih.gov/19244192/)
5. Stephenson BL, Wohl DA, Golin CE, Tien HC, Stewart P, Kaplan AH. Effect of release from prison and re-incarceration on the viral loads of HIV-infected individuals. *Public Health Rep*, 2005. 120(1): p. 84–8. PMID: [15736336](https://pubmed.ncbi.nlm.nih.gov/15736336/)
6. Clements-Nolle K, Marx R, Pendo M, Loughran E, Estes M, Katz M. Highly active antiretroviral therapy use and HIV transmission risk behaviors among individuals who are HIV infected and were recently released from jail. *Am J Public Health*, 2008. 98(4): p. 661–6. doi: [10.2105/AJPH.2007.112656](https://doi.org/10.2105/AJPH.2007.112656) PMID: [18309132](https://pubmed.ncbi.nlm.nih.gov/18309132/)
7. Dennis AC, Barrington C, Hino S, Gould M, Wohl D, Golin CE. "You're in a world of chaos": experiences accessing HIV care and adhering to medications after incarceration. *J Assoc Nurses AIDS Care*, 2015. 26(5): p. 542–55. doi: [10.1016/j.jana.2015.06.001](https://doi.org/10.1016/j.jana.2015.06.001) PMID: [26188413](https://pubmed.ncbi.nlm.nih.gov/26188413/)
8. Spaulding AC, Seals RM, Page MJ, Brzozowski AK, Rhodes W, Hammett TM. HIV/AIDS among inmates of and releasees from US correctional facilities, 2006: declining share of epidemic but persistent public health opportunity. *PLoS One*, 2009. 4(11): p. e7558. doi: [10.1371/journal.pone.0007558](https://doi.org/10.1371/journal.pone.0007558) PMID: [19907649](https://pubmed.ncbi.nlm.nih.gov/19907649/)
9. Carson E.A., Prisoners in 2014, U.S.D.o. Justice, Editor. 2014, Bureau of Justice Statistics: Washington, D.C.
10. Kaeble D, Maruschak LM, Bonczar TP. Probation and Parole in the United States, 2014; 2015, Bureau of Justice Statistics: Washington, D.C.
11. Fazel S., Bains P., and Doll H., Substance abuse and dependence in prisoners: a systematic review. *Addiction*, 2006. 101(2): p. 181–91. doi: [10.1111/j.1360-0443.2006.01316.x](https://doi.org/10.1111/j.1360-0443.2006.01316.x) PMID: [16445547](https://pubmed.ncbi.nlm.nih.gov/16445547/)
12. Proctor SL. Substance use disorder prevalence among female state prison inmates. *Am J Drug Alcohol Abuse*, 2012. 38(4): p. 278–85. doi: [10.3109/00952990.2012.668596](https://doi.org/10.3109/00952990.2012.668596) PMID: [22443915](https://pubmed.ncbi.nlm.nih.gov/22443915/)
13. Maruschak LM, Beavers R. HIV in prisons, 2007–2008 U.S.D.o. Justice, Editor. 2010, Bureau of Justice Statistics: Washington, D.C.
14. Beckwith CG, Zaller ND, Fu JJ, Montague BT, Rich JD. Opportunities to diagnose, treat, and prevent HIV in the criminal justice system. *J Acquir Immune Defic Syndr*, 2010. 55 Suppl 1: p. S49–55.
15. Staton-Tindall M, Webster JM, Oser CB, Havens JR, Leukefeld CG. Drug use, hepatitis C, and service availability: perspectives of incarcerated rural women. *Soc Work Public Health*, 2015. 30(4): p. 385–96. doi: [10.1080/19371918.2015.1021024](https://doi.org/10.1080/19371918.2015.1021024) PMID: [25950907](https://pubmed.ncbi.nlm.nih.gov/25950907/)
16. Binswanger IA, Merrill JO, Krueger PM, White MC, Booth RE, Elmore JG. Gender differences in chronic medical, psychiatric, and substance-dependence disorders among jail inmates. *Am J Public Health*, 2010. 100(3): p. 476–82. doi: [10.2105/AJPH.2008.149591](https://doi.org/10.2105/AJPH.2008.149591) PMID: [19696388](https://pubmed.ncbi.nlm.nih.gov/19696388/)
17. Meyer JP, Zelenev A, Wickersham JA, Williams CT, Teixeira PA, Altice FL. Gender disparities in HIV treatment outcomes following release from jail: results from a multicenter study. *Am J Public Health*, 2014. 104(3): p. 434–41. doi: [10.2105/AJPH.2013.301553](https://doi.org/10.2105/AJPH.2013.301553) PMID: [24432878](https://pubmed.ncbi.nlm.nih.gov/24432878/)
18. Kim S, Johnson TP, Goswami S, Puisis M. Risk factors for homelessness and sex trade among incarcerated women: A Structural equation model. *J Int Womens Stud*, 2011. 12(1): p. 128–148. PMID: [22162944](https://pubmed.ncbi.nlm.nih.gov/22162944/)
19. Herbst JH, Jacobs ED, Finlayson TJ, McKleroy VS, Neumann MS, Crepaz N, et al. Estimating HIV prevalence and risk behaviors of transgender persons in the United States: a systematic review. *AIDS Behav*, 2008. 12(1): p. 1–17. doi: [10.1007/s10461-007-9299-3](https://doi.org/10.1007/s10461-007-9299-3) PMID: [17694429](https://pubmed.ncbi.nlm.nih.gov/17694429/)
20. Baral SD, Poteat T, Stromdahl S, Wirtz AL, Guadamuz TW, Beyrer C. Worldwide burden of HIV in transgender women: a systematic review and meta-analysis. *Lancet Infect Dis*, 2013. 13(3): p. 214–22. doi: [10.1016/S1473-3099\(12\)70315-8](https://doi.org/10.1016/S1473-3099(12)70315-8) PMID: [23260128](https://pubmed.ncbi.nlm.nih.gov/23260128/)
21. Sexton L, Jenness V, Sumner JM. Where the Margins Meet: A Demographic Assessment of Transgender Inmates in Men's Prisons. *Justice Quarterly*, 2010. 27(6): p. 835–866.
22. Fletcher JB, Kisler KA, Reback CJ. Housing Status and HIV Risk Behaviors Among Transgender Women in Los Angeles. *Archives of Sexual Behavior*, 2014. 43(8): p. 1651–1661. doi: [10.1007/s10508-014-0368-1](https://doi.org/10.1007/s10508-014-0368-1) PMID: [25190499](https://pubmed.ncbi.nlm.nih.gov/25190499/)
23. Lombardi EL, Wilchins RA, Priesing D, Malouf D. Gender violence: Transgender experiences with violence and discrimination. *Journal of Homosexuality*, 2001. 42(1): p. 89–101. PMID: [11991568](https://pubmed.ncbi.nlm.nih.gov/11991568/)
24. Hartzell E, Frazer MS, Wertz K, Davis M, The State of Transgender California: Results from the 2008 California Transgender Economic Health Survey 2009, Transgender Law Center: San Francisco, CA.
25. Hwahng SJ, Nuttbrock L. Sex Workers, Fem Queens, and Cross-Dressers: Differential Marginalizations and HIV Vulnerabilities Among Three Ethnocultural Male-to-Female Transgender Communities in New York City. *Sex Res Social Policy*, 2007. 4(4): p. 36–59. doi: [10.1525/srsp.2007.4.4.36](https://doi.org/10.1525/srsp.2007.4.4.36) PMID: [19079558](https://pubmed.ncbi.nlm.nih.gov/19079558/)

26. Chandler RK, Kahana SY, Fletcher B, Jones D, Finger MS, Aklin WM, et al. Data Collection and Harmonization in HIV Research: The Seek, Test, Treat, and Retain Initiative at the National Institute on Drug Abuse. *Am J Public Health*, 2015. 105(12): p. 2416–22. doi: [10.2105/AJPH.2015.302788](https://doi.org/10.2105/AJPH.2015.302788) PMID: [26469642](https://pubmed.ncbi.nlm.nih.gov/26469642/)
27. Check Hayden E. 'Seek, test and treat' slows HIV. *Nature*, 2010. 463(7284): p. 1006. doi: [10.1038/4631006a](https://doi.org/10.1038/4631006a) PMID: [20182479](https://pubmed.ncbi.nlm.nih.gov/20182479/)
28. Taeye A. Seek and treat: HIV update 2011. *Cleve Clin J Med*, 2011. 78(2): p. 95–100. doi: [10.3949/ccjm.78gr.10003](https://doi.org/10.3949/ccjm.78gr.10003) PMID: [21285341](https://pubmed.ncbi.nlm.nih.gov/21285341/)
29. Granich RM, Gilks CF, Dye C, De Cock KM, Williams BG. Universal voluntary HIV testing with immediate antiretroviral therapy as a strategy for elimination of HIV transmission: a mathematical model. *Lancet*, 2009. 373(9657): p. 48–57. doi: [10.1016/S0140-6736\(08\)61697-9](https://doi.org/10.1016/S0140-6736(08)61697-9) PMID: [19038438](https://pubmed.ncbi.nlm.nih.gov/19038438/)
30. Strategic Information Division, S.T.C.D., Hepatitis Coordinator, The George Washington University Milken Institute School of Public Health, District of Columbia The Annual Epidemiology & Surveillance Report 2014, D.D.o. Health, Editor. 2014, HIV/AIDS, Hepatitis, STD and TB Administration (HAHSTA): Washington, D.C.
31. Kurth A, Kuo I, Peterson J, Azikiwe N, Bazerman L, Cates A, et al. Information and Communication Technology to Link Criminal Justice Reentrants to HIV Care in the Community. *AIDS Res Treat*, 2013. 2013: p. 547381.
32. Skeels MM, Kurth A, Clausen M, Severynyn A, Garcia-Smith H. CARE+ user study: usability and attitudes towards a tablet pc computer counseling tool for HIV+ men and women. *AMIA Annu Symp Proc*, 2006: p. 729–33. PMID: [17238437](https://pubmed.ncbi.nlm.nih.gov/17238437/)
33. Spielberg F, Kurth AE, Severynyn A, Hsieh YH, Moring-Parris D, Mackenzie S, et al. Computer-facilitated rapid HIV testing in emergency care settings: provider and patient usability and acceptability. *AIDS Educ Prev*, 2011. 23(3): p. 206–21. doi: [10.1521/aeap.2011.23.3.206](https://doi.org/10.1521/aeap.2011.23.3.206) PMID: [21696240](https://pubmed.ncbi.nlm.nih.gov/21696240/)
34. Peterson J, Cota M, Gray H, Bazerman L, Kuo I, Kurth A, et al. Technology use in linking criminal justice reentrants to HIV care in the community: a qualitative formative research study. *J Health Commun*, 2015. 20(3): p. 245–51. doi: [10.1080/10810730.2014.927036](https://doi.org/10.1080/10810730.2014.927036) PMID: [25529057](https://pubmed.ncbi.nlm.nih.gov/25529057/)
35. Daepfen JB, Yersin B, Landry U, Pecoud A, Decrey H. Reliability and validity of the Alcohol Use Disorders Identification Test (AUDIT) imbedded within a general health risk screening questionnaire: results of a survey in 332 primary care patients. *Alcohol Clin Exp Res*, 2000. 24(5): p. 659–65. PMID: [10832907](https://pubmed.ncbi.nlm.nih.gov/10832907/)
36. Pankow J, Simpson DD, Joe GW, Rowan-Szai GA, Knight K, Meason P. Examining Concurrent Validity and Predictive Utility for the Addiction Severity Index and Texas Christian University (TCU) Short Forms. *J Offender Rehabil*, 2012. 51(1–2): p. 78–95. doi: [10.1080/10509674.2012.633021](https://doi.org/10.1080/10509674.2012.633021) PMID: [23087588](https://pubmed.ncbi.nlm.nih.gov/23087588/)
37. Prins A, Ouimette P, Kimerling R, Skeikh J. The primary care PTSD screen (PC-PTSD): development and operating characteristics. *Primary Care Psychiatry*, 2013. 9, 9–14.
38. Radloff LS. The CES-D scale: A self report depression scale for research in the general population. *Applied Psychological Measurements*, 1977. 1, 385–401.
39. Buscher A, Hartman C, Kallen MA, Giordano TP. Validity of self-report measures in assessing antiretroviral adherence of newly diagnosed, HAART-naive, HIV patients. *HIV Clin Trials*, 2011. 12(5): p. 244–54. doi: [10.1310/hct1205-244](https://doi.org/10.1310/hct1205-244) PMID: [22180522](https://pubmed.ncbi.nlm.nih.gov/22180522/)
40. Bradley H, Hall HI, Wolitski RJ, Van Handel MM, Stone AE, LaFlam M, et al. Vital Signs: HIV Diagnosis, Care, and Treatment Among Persons Living with HIV—United States, 2011. *Morbidity and Mortality Weekly Report*. 2014. 63(47):1113–1117. PMID: [25426654](https://pubmed.ncbi.nlm.nih.gov/25426654/)
41. Bradley H, Mattson CL, Beer L, Huang P, Shouse RL, Medical Monitoring Project. Increased antiretroviral therapy prescription and HIV viral suppression among persons receiving clinical care for HIV infection. *AIDS*, 2016. 30(13):2117–24. doi: [10.1097/QAD.0000000000001164](https://doi.org/10.1097/QAD.0000000000001164) PMID: [27465279](https://pubmed.ncbi.nlm.nih.gov/27465279/)
42. Cohen SM, Hu X, Sweeney P, Johnson AS, Hall HI. HIV viral suppression among persons with varying levels of engagement in HIV medical care, 19 US jurisdictions. *JAIDS*, 2014. 67(5): 519–27. doi: [10.1097/QAI.0000000000000349](https://doi.org/10.1097/QAI.0000000000000349) PMID: [25230292](https://pubmed.ncbi.nlm.nih.gov/25230292/)
43. Castel AD, Tang W, Peterson J, Mikre M, Parenti D, Elion R, et al. Sorting through the lost and found: are patient perceptions of engagement in care consistent with standard continuum of care measures? *J Acquir Immune Defic Syndr*, 2015. 69 Suppl 1: p. S44–55.
44. Vagenas P, Zelenev A, Altice FL, DiPaola A, Jordan AO, Teixeira PA, et al. HIV-infected men who have sex with men, before and after release from jail: the impact of age and race, results from a multi-site study. *Aids Care—Psychological and Socio-Medical Aspects of Aids/Hiv*, 2016. 28(1): p. 22–31.

45. Williams CT, Kim S, Meyer J, Spaulding AC, Teixeira P, Avery A, et al. Gender differences in baseline health, needs at release, and predictors of care engagement among HIV-positive clients leaving jail. *AIDS Behav*, 2013. 17 Suppl 2: p. S195–202.
46. Meyer JP, Cepeda J, Taxman FS, Altice FL. Sex-Related Disparities in Criminal Justice and HIV Treatment Outcomes: A Retrospective Cohort Study of HIV-Infected Inmates. *Am J Public Health*, 2015. 105(9): p. 1901–10. doi: [10.2105/AJPH.2015.302687](https://doi.org/10.2105/AJPH.2015.302687) PMID: [26180958](https://pubmed.ncbi.nlm.nih.gov/26180958/)
47. Mostashari F, Riley E, Selwyn PA, Altice FL. Acceptance and adherence with antiretroviral therapy among HIV-infected women in a correctional facility. *Journal of Acquired Immune Deficiency Syndromes and Human Retrovirology*, 1998. 18(4): p. 341–348. PMID: [9704939](https://pubmed.ncbi.nlm.nih.gov/9704939/)
48. Starr SB. Estimating Gender Disparities in Federal Criminal Cases. *American Law and Economics Review*, 2015. 17(1): p. 127–159.
49. Melendez RM, Exner TA, Ehrhardt AA, Dodge B, Remien RH, Rotheram-Borus MJ, et al. Health and health care among male-to-female transgender persons who are HIV positive. *Am J Public Health*, 2006. 96(6): p. 1034–7. doi: [10.2105/AJPH.2004.042010](https://doi.org/10.2105/AJPH.2004.042010) PMID: [16131645](https://pubmed.ncbi.nlm.nih.gov/16131645/)
50. Mizuno Y, Frazier EL, Huang P, Skarbinski J. Characteristics of Transgender Women Living with HIV Receiving Medical Care in the United States. *LGBT Health*, 2015. 2(3): p. 228–34. doi: [10.1089/lgbt.2014.0099](https://doi.org/10.1089/lgbt.2014.0099) PMID: [26788671](https://pubmed.ncbi.nlm.nih.gov/26788671/)
51. Nuttbrock L, Bockting W, Rosenblum A, Hwahng S, Mason M, Macri M, et al. Gender Abuse and Incident HIV/STI Among Transgender Women in New York City: Buffering Effect of Involvement in a Transgender Community. *AIDS Behav*, 2015. 19(8): p. 1446–53. doi: [10.1007/s10461-014-0977-7](https://doi.org/10.1007/s10461-014-0977-7) PMID: [25533923](https://pubmed.ncbi.nlm.nih.gov/25533923/)
52. Poteat T, Reisner SL, Radix A. HIV epidemics among transgender women. *Curr Opin HIV AIDS*, 2014. 9(2): p. 168–73. doi: [10.1097/COH.0000000000000030](https://doi.org/10.1097/COH.0000000000000030) PMID: [24322537](https://pubmed.ncbi.nlm.nih.gov/24322537/)
53. Sevelius JM, Carrico A, Johnson MO. Antiretroviral therapy adherence among transgender women living with HIV. *J Assoc Nurses AIDS Care*, 2010. 21(3): p. 256–64. doi: [10.1016/j.jana.2010.01.005](https://doi.org/10.1016/j.jana.2010.01.005) PMID: [20347342](https://pubmed.ncbi.nlm.nih.gov/20347342/)
54. Sevelius JM, Patouhas E, Keatley JG, Johnson MO. Barriers and facilitators to engagement and retention in care among transgender women living with human immunodeficiency virus. *Ann Behav Med*, 2014. 47(1): p. 5–16. doi: [10.1007/s12160-013-9565-8](https://doi.org/10.1007/s12160-013-9565-8) PMID: [24317955](https://pubmed.ncbi.nlm.nih.gov/24317955/)
55. Sevelius JM, Saberi P, Johnson MO. Correlates of antiretroviral adherence and viral load among transgender women living with HIV. *AIDS Care*, 2014. 26(8): p. 976–82. doi: [10.1080/09540121.2014.896451](https://doi.org/10.1080/09540121.2014.896451) PMID: [24646419](https://pubmed.ncbi.nlm.nih.gov/24646419/)
